# Supplementary material for: Association between Socioeconomic Status and Digestive Tract Cancers: A Case-Control Study
Source: PubMed Central journal article supplement (PMC7694284; doi:10.3390/cancers12113258), 2020-11-04
Supplement: cancers-12-03258-s001.pdf [file cancers-12-03258-s001.pdf]

# Supplementary Materials: Association Between Socioeconomic Status and Digestive Tract Cancers: A Case-Control Study

Yukino Kawakatsu, Yuriko N. Koyanagi, Isao Oze, Yumiko Kasugai, Hisayoshi Morioka, Rui Yamaguchi, Hidemi Ito and Keitaro Matsuo

**Table S1.** Association between educational level and risk of subject cancers by site <sup>1</sup>.

| Educational Level   | Case | Control | Crude      |                      |                     | Model 1                |                      |                     | Model 2    |                      |                     |           |       |                  |  |                        |
|---------------------|------|---------|------------|----------------------|---------------------|------------------------|----------------------|---------------------|------------|----------------------|---------------------|-----------|-------|------------------|--|------------------------|
|                     |      |         | Odds Ratio | (95% Conf. Interval) | <i>p</i> > <i>z</i> | Odds Ratio             | (95% Conf. Interval) | <i>p</i> > <i>z</i> | Odds Ratio | (95% Conf. Interval) | <i>p</i> > <i>z</i> |           |       |                  |  |                        |
| Stomach             |      |         |            |                      |                     |                        |                      |                     |            |                      |                     |           |       |                  |  |                        |
| ≤junior high school | 122  | 83      | 1          | Reference            |                     |                        | 1                    | Reference           |            |                      | 1                   | Reference |       |                  |  |                        |
| ≤high school        | 339  | 278     | 0.81       | 0.57                 | 1.17                | 0.262                  | 0.82                 | 0.57                | 1.18       | 0.287                | 0.78                | 0.53      | 1.15  | 0.213            |  |                        |
| higher education    | 326  | 426     | 0.54       | 0.37                 | 0.79                | 0.002                  | 0.56                 | 0.38                | 0.83       | 0.004                | 0.52                | 0.34      | 0.78  | 0.002            |  |                        |
| trend <i>p</i> =    |      |         |            |                      |                     | 1.7 × 10 <sup>-4</sup> | trend <i>p</i> =     |                     |            |                      |                     |           | 0.001 | trend <i>p</i> = |  | 2.0 × 10 <sup>-4</sup> |

<sup>1</sup> Model 1 and Model 2 further adjusted for *H. pylori* and atrophic gastritis.

**Table S2.** Association between the quintiles of the areal deprivation index and risk of subject cancers by sites <sup>1</sup>.

| Quintile of ADI  | Case | Control | Crude      |                      |                     | Model 1    |                      |                     | Model 2    |                      |                     |           |       |                  |  |      |
|------------------|------|---------|------------|----------------------|---------------------|------------|----------------------|---------------------|------------|----------------------|---------------------|-----------|-------|------------------|--|------|
|                  |      |         | Odds Ratio | (95% Conf. Interval) | <i>p</i> > <i>z</i> | Odds Ratio | (95% Conf. Interval) | <i>p</i> > <i>z</i> | Odds Ratio | (95% Conf. Interval) | <i>p</i> > <i>z</i> |           |       |                  |  |      |
| Stomach          |      |         |            |                      |                     |            |                      |                     |            |                      |                     |           |       |                  |  |      |
| Q1               | 123  | 161     | 1          | Reference            |                     |            | 1                    | Reference           |            |                      | 1                   | Reference |       |                  |  |      |
| Q2               | 172  | 163     | 1.43       | 0.99                 | 2.07                | 0.057      | 1.49                 | 1.02                | 2.18       | 0.038                | 1.64                | 1.10      | 2.43  | 0.014            |  |      |
| Q3               | 165  | 160     | 1.23       | 0.85                 | 1.77                | 0.269      | 1.25                 | 0.86                | 1.81       | 0.243                | 1.28                | 0.87      | 1.89  | 0.211            |  |      |
| Q4               | 182  | 150     | 1.49       | 1.03                 | 2.15                | 0.036      | 1.42                 | 0.97                | 2.08       | 0.07                 | 1.55                | 1.05      | 2.30  | 0.029            |  |      |
| Q5               | 151  | 159     | 1.20       | 0.83                 | 1.74                | 0.327      | 1.20                 | 0.82                | 1.74       | 0.348                | 1.27                | 0.86      | 1.88  | 0.224            |  |      |
| trend <i>p</i> = |      |         |            |                      |                     | 0.392      | trend <i>p</i> =     |                     |            |                      |                     |           | 0.534 | trend <i>p</i> = |  | 0.39 |

<sup>1</sup> Model 1 and Model 2 further adjusted for *H. pylori* and atrophic gastritis.

**Table S3.** Association between educational level and risk of subject cancers by site stratified by age.

| Educational Level   | Model 2(<60 Years Old) |         |            |                      |                     |       | Model 2(≥60 Years Old) |         |            |                      |                     |       | Model 2 |            |                      |                     |      |                        |
|---------------------|------------------------|---------|------------|----------------------|---------------------|-------|------------------------|---------|------------|----------------------|---------------------|-------|---------|------------|----------------------|---------------------|------|------------------------|
|                     | Case                   | Control | Odds Ratio | (95% Conf. Interval) | <i>p</i> > <i>z</i> |       | Case                   | Control | Odds Ratio | (95% Conf. Interval) | <i>p</i> > <i>z</i> | Case  | Control | Odds Ratio | (95% Conf. Interval) | <i>p</i> > <i>z</i> |      |                        |
| Head and Neck       |                        |         |            |                      |                     |       |                        |         |            |                      |                     |       |         |            |                      |                     |      |                        |
| ≤junior high school | 19                     | 15      | 1          |                      |                     |       | 104                    | 53      | 1          |                      |                     |       | 123     | 68         | 1                    | Reference           |      |                        |
| ≤high school        | 100                    | 77      | 1.87       | 0.78                 | 4.51                | 0.161 | 128                    | 138     | 0.54       | 0.34                 | 0.85                | 0.009 | 228     | 215        | 0.67                 | 0.43                | 1.03 | 0.069                  |
| higher education    | 134                    | 167     | 1.12       | 0.47                 | 2.64                | 0.798 | 98                     | 130     | 0.47       | 0.29                 | 0.77                | 0.003 | 232     | 297        | 0.43                 | 0.27                | 0.68 | 3.2 × 10 <sup>-4</sup> |

|                     |     |     |      |      | trend<br><i>p</i> = | 0.157                  |     |     |      |      | trend<br><i>p</i> = | 0.005                  |     |     |      | trend<br><i>p</i> = | 1.4 × 10 <sup>-4</sup> |                        |
|---------------------|-----|-----|------|------|---------------------|------------------------|-----|-----|------|------|---------------------|------------------------|-----|-----|------|---------------------|------------------------|------------------------|
| Esophagus           |     |     |      |      |                     |                        |     |     |      |      |                     |                        |     |     |      |                     |                        |                        |
| ≤junior high school | 13  | 3   | 1    |      |                     |                        | 1   |     |      |      |                     |                        | 103 | 67  | 1    | Reference           |                        |                        |
| ≤high school        | 70  | 58  | 0.24 | 0.03 | 1.99                | 0.184                  | 90  | 64  | 0.63 | 0.38 | 1.04                | 0.070                  | 193 | 175 | 0.63 | 0.35                | 1.13                   | 0.121                  |
| higher education    | 74  | 103 | 0.13 | 0.02 | 1.08                | 0.059                  | 123 | 117 | 0.64 | 0.39 | 1.06                | 0.081                  | 202 | 254 | 0.64 | 0.36                | 1.15                   | 0.137                  |
|                     |     |     |      |      | trend<br><i>p</i> = | 0.023                  | 128 | 151 |      |      | trend<br><i>p</i> = | 0.111                  |     |     |      | trend<br><i>p</i> = | 0.172                  |                        |
| Stomach             |     |     |      |      |                     |                        |     |     |      |      |                     |                        |     |     |      |                     |                        |                        |
| ≤junior high school | 29  | 16  | 1    |      |                     |                        | 164 | 122 | 1    |      |                     |                        | 193 | 138 | 1    | Reference           |                        |                        |
| ≤high school        | 170 | 129 | 0.77 | 0.39 | 1.54                | 0.464                  | 311 | 286 | 0.82 | 0.61 | 1.10                | 0.184                  | 481 | 415 | 0.79 | 0.60                | 1.05                   | 0.105                  |
| higher education    | 228 | 303 | 0.44 | 0.22 | 0.88                | 0.019                  | 225 | 280 | 0.63 | 0.46 | 0.86                | 0.003                  | 453 | 583 | 0.52 | 0.38                | 0.69                   | 9.9 × 10 <sup>-6</sup> |
|                     |     |     |      |      | trend<br><i>p</i> = | 1.0 × 10 <sup>-4</sup> |     |     |      |      | trend<br><i>p</i> = | 0.003                  |     |     |      | trend<br><i>p</i> = | 5.5 × 10 <sup>-7</sup> |                        |
| Colorectum          |     |     |      |      |                     |                        |     |     |      |      |                     |                        |     |     |      |                     |                        |                        |
| ≤junior high school | 27  | 14  | 1    |      |                     |                        | 139 | 93  | 1    |      |                     |                        | 166 | 107 | 1    | Reference           |                        |                        |
| ≤high school        | 157 | 127 | 0.64 | 0.31 | 1.34                | 0.236                  | 229 | 223 | 0.69 | 0.49 | 0.97                | 0.032                  | 386 | 350 | 0.69 | 0.51                | 0.93                   | 0.016                  |
| higher education    | 229 | 277 | 0.48 | 0.23 | 0.98                | 0.045                  | 161 | 207 | 0.52 | 0.37 | 0.75                | 3.9 × 10 <sup>-4</sup> | 390 | 484 | 0.52 | 0.38                | 0.71                   | 2.9 × 10 <sup>-5</sup> |
|                     |     |     |      |      | trend<br><i>p</i> = | 0.014                  |     |     |      |      | trend<br><i>p</i> = | 4.1 × 10 <sup>-4</sup> |     |     |      | trend<br><i>p</i> = | 1.2 × 10 <sup>-5</sup> |                        |

**Table S4.** Association between the quintiles of the deprivation index and risk of subject cancers by sites <sup>4</sup>.

| Quintile of ADI | Case | Control | Crude <sup>1</sup> |                      |                     | Model 1 <sup>2</sup> |                      |                     | Model 2 <sup>3</sup> |                      |                     |      |      |                  |       |
|-----------------|------|---------|--------------------|----------------------|---------------------|----------------------|----------------------|---------------------|----------------------|----------------------|---------------------|------|------|------------------|-------|
|                 |      |         | Odds Ratio         | (95% Conf. Interval) | <i>p</i> > <i>z</i> | Odds Ratio           | (95% Conf. Interval) | <i>p</i> > <i>z</i> | Odds Ratio           | (95% Conf. Interval) | <i>p</i> > <i>z</i> |      |      |                  |       |
| Head and Neck   |      |         |                    |                      |                     |                      |                      |                     |                      |                      |                     |      |      |                  |       |
| Q1              | 98   | 116     | 1                  | Reference            |                     | 1                    | Reference            |                     | 1                    | Reference            |                     |      |      |                  |       |
| Q2              | 108  | 115     | 1.13               | 0.76                 | 1.68                | 0.541                | 1.34                 | 0.86                | 2.08                 | 0.192                | 1.28                | 0.80 | 2.07 | 0.302            |       |
| Q3              | 116  | 116     | 1.19               | 0.81                 | 1.74                | 0.370                | 1.19                 | 0.78                | 1.82                 | 0.415                | 1.03                | 0.65 | 1.63 | 0.907            |       |
| Q4              | 136  | 117     | 1.40               | 0.96                 | 2.04                | 0.083                | 1.62                 | 1.07                | 2.47                 | 0.024                | 1.60                | 1.01 | 2.52 | 0.043            |       |
| Q5              | 124  | 113     | 1.30               | 0.89                 | 1.89                | 0.179                | 1.47                 | 0.97                | 2.24                 | 0.072                | 1.53                | 0.98 | 2.41 | 0.064            |       |
|                 |      |         |                    |                      |                     | trend <i>p</i> =     | 0.12                 |                     |                      | trend <i>p</i> =     | 0.074               |      |      | trend <i>p</i> = | 0.050 |
| Esophagus       |      |         |                    |                      |                     |                      |                      |                     |                      |                      |                     |      |      |                  |       |
| Q1              | 71   | 99      | 1                  | Reference            |                     | 1                    | Reference            |                     | 1                    | Reference            |                     |      |      |                  |       |
| Q2              | 67   | 100     | 0.93               | 0.60                 | 1.45                | 0.761                | 0.74                 | 0.40                | 1.36                 | 0.336                | 0.72                | 0.36 | 1.43 | 0.352            |       |
| Q3              | 95   | 98      | 1.37               | 0.90                 | 2.09                | 0.137                | 1.39                 | 0.81                | 2.41                 | 0.234                | 1.51                | 0.80 | 2.86 | 0.203            |       |
| Q4              | 128  | 99      | 1.81               | 1.20                 | 2.71                | 0.005                | 1.26                 | 0.74                | 2.15                 | 0.404                | 1.23                | 0.67 | 2.27 | 0.504            |       |
| Q5              | 138  | 99      | 1.95               | 1.29                 | 2.95                | 0.002                | 1.50                 | 0.86                | 2.62                 | 0.151                | 1.77                | 0.94 | 3.34 | 0.079            |       |

|            |     | trend $p = 2.5 \times 10^{-5}$ |      |           |      |                      | trend $p = 0.032$ |           |      |       |      | trend $p = 0.018$ |      |                      |  |
|------------|-----|--------------------------------|------|-----------|------|----------------------|-------------------|-----------|------|-------|------|-------------------|------|----------------------|--|
| Stomach    |     |                                |      |           |      |                      |                   |           |      |       |      |                   |      |                      |  |
| Q1         | 152 | 228                            | 1    | Reference |      |                      | 1                 | Reference |      |       | 1    | Reference         |      |                      |  |
| Q2         | 238 | 228                            | 1.56 | 1.18      | 2.06 | 0.002                | 1.61              | 1.20      | 2.14 | 0.001 | 1.73 | 1.28              | 2.33 | $3.3 \times 10^{-4}$ |  |
| Q3         | 241 | 227                            | 1.56 | 1.19      | 2.05 | 0.001                | 1.60              | 1.21      | 2.12 | 0.001 | 1.64 | 1.23              | 2.20 | 0.001                |  |
| Q4         | 263 | 228                            | 1.75 | 1.32      | 2.31 | $8.2 \times 10^{-5}$ | 1.66              | 1.25      | 2.22 | 0.001 | 1.74 | 1.29              | 2.34 | $2.7 \times 10^{-4}$ |  |
| Q5         | 232 | 227                            | 1.53 | 1.16      | 2.03 | 0.003                | 1.54              | 1.16      | 2.06 | 0.003 | 1.61 | 1.20              | 2.17 | 0.002                |  |
|            |     | trend $p = 0.003$              |      |           |      |                      | trend $p = 0.009$ |           |      |       |      | trend $p = 0.007$ |      |                      |  |
| Colorectum |     |                                |      |           |      |                      |                   |           |      |       |      |                   |      |                      |  |
| Q1         | 145 | 189                            | 1    | Reference |      |                      | 1                 | Reference |      |       | 1    | Reference         |      |                      |  |
| Q2         | 180 | 190                            | 1.23 | 0.91      | 1.66 | 0.172                | 1.13              | 0.83      | 1.54 | 0.432 | 1.12 | 0.82              | 1.54 | 0.472                |  |
| Q3         | 212 | 187                            | 1.47 | 1.10      | 1.96 | 0.01                 | 1.40              | 1.04      | 1.88 | 0.027 | 1.37 | 1.01              | 1.86 | 0.044                |  |
| Q4         | 233 | 189                            | 1.60 | 1.20      | 2.14 | 0.001                | 1.51              | 1.12      | 2.03 | 0.007 | 1.43 | 1.05              | 1.95 | 0.024                |  |
| Q5         | 175 | 188                            | 1.21 | 0.90      | 1.62 | 0.217                | 1.09              | 0.80      | 1.48 | 0.584 | 1.02 | 0.75              | 1.41 | 0.880                |  |
|            |     | trend $p = 0.075$              |      |           |      |                      | trend $p = 0.209$ |           |      |       |      | trend $p = 0.463$ |      |                      |  |

<sup>1</sup> Crude model considering matching factors (age and sex) in the conditional logistic regression model. <sup>2</sup> Model 1 further adjusted for alcohol intake, PY of smoking, and family history of subject cancer. <sup>3</sup> Model 2 further adjusted for BMI, past history of diabetes, physical activity (metabolic equivalent (MET)-per week), vegetable/fruit intake, beef/pork intake, and processed meat intake. <sup>4</sup> Some cases were excluded, because the areal deprivation index was unknown or unstable (13 cases of head and neck cancer, 8 cases of esophageal cancer, 23 cases of stomach cancer, and 15 cases of colorectal cancer were excluded).

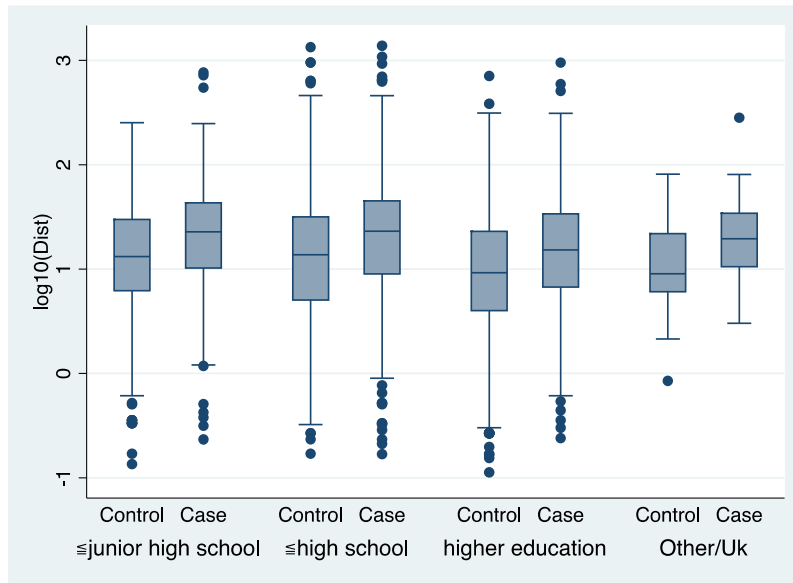

**Figure S1.** The physical distances between the residential addresses and our hospital by education level.

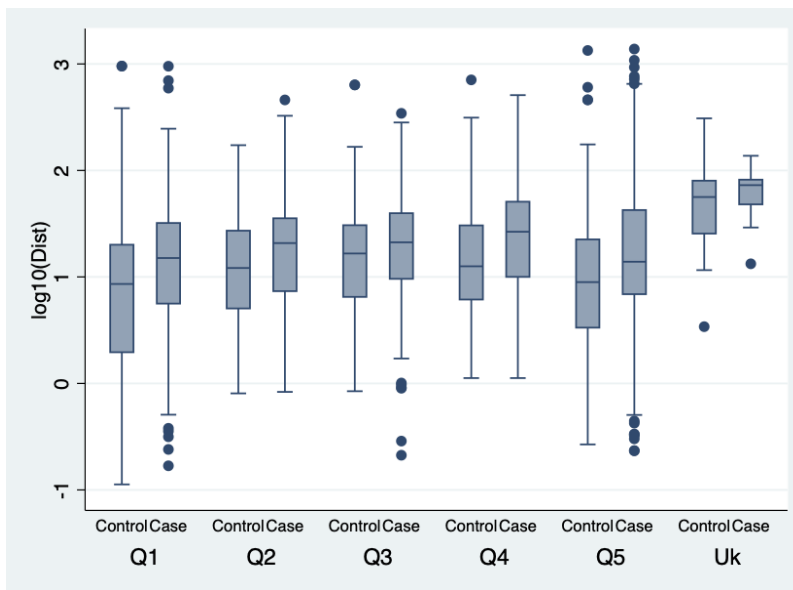

**Figure S2.** The physical distances between the residential addresses and our hospital by areal deprivation index.

**Publisher’s Note:** MDPI stays neutral with regard to jurisdictional claims in published maps and institutional affiliations.

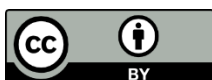

© 2020 by the authors. Licensee MDPI, Basel, Switzerland. This article is an open access article distributed under the terms and conditions of the Creative Commons Attribution (CC BY) license (<http://creativecommons.org/licenses/by/4.0/>).
